# Supplementary material for: Clinical characteristic and outcome of HHV-6 encephalitis after allogeneic hematopoietic cell transplantation: A retrospective study of Infectious Disease Working Party of EBMT
Source: Research Square preprint supplement (doi:10.21203/rs.3.rs-6290272/v1), 2025-04-21
Supplement: Supplementary file 1 [file 98466bb8fec8b89f234f4988.docx]

Table 2. Univariate analysis of risk factors for overall survival in patients with HHV-6 encephalitis

| **Variable** | **N** | **Overall**  N = 97 | | **N°**  **events** | | **28 Days**  **OS (95% C.I.)** | **90 Days**  **OS (95% C.I.)** | **365 Days**  **OS (95% C.I.)** | **HR** | **95% CI** | **p-value*** |
| --- | --- | --- | --- | --- | --- | --- | --- | --- | --- | --- | --- |
| **All** | 97 |  | | 72 | | 77% (69%, 86%) | 55% (46%, 66%) | 41% (32%, 52%) |  |  |  |
| **Sex** | 97 |  | |  | |  |  |  |  |  |  |
| M |  | 66 (68%) | | 49 | | 77% (68%, 88%) | 58% (47%, 71%) | 42% (32%, 56%) | 1.00 |  |  |
| F |  | 31 (32%) | | 23 | | 77% (64%, 94%) | 48% (34%, 70%) | 39% (25%, 60%) | 1.05 | 0.64, 1.73 | 0.8 |
| **Age class** | 97 |  | |  | |  |  |  |  |  |  |
| < 18 year |  | 20 (21%) | | 11 | | 90% (78%, 100%) | 70% (53%, 93%) | 55% (37%, 82%) | — | — |  |
| >18 year |  | 77 (79%) | | 61 | | 74% (65%, 84%) | 51% (41%, 63%) | 38% (28%, 50%) | 1.88 | 0.99, 3.58 | 0.055 |
| **Underlying disease** | 92 |  | |  | |  |  |  |  |  |  |
| AL - B-cell lymphoma |  | 52 (57%) | | 36 | | 79% (68%, 91%) | 56% (44%, 71%) | 40% (29%, 56%) | — | — |  |
| Other |  | 40 (43%) | | 33 | | 78% (66%, 92%) | 53% (39%, 70%) | 40% (27%, 58%) | 1.22 | 0.76, 1.96 | 0.4 |
| **Donor type** | 97 |  | |  | |  |  |  |  |  |  |
| Haplo |  | 5 (5.2%) | | 4 | |  |  |  |  |  |  |
| Identical sibling |  | 4 (4.1%) | | 4 | |  |  | - |  |  |  |
| Unrelated |  | 88 (91%) | | 64 | | 77% (69%, 87%) | 57% (47%, 68%) | 44% (35%, 56%) |  |  |  |
| **Stem cell source** | 97 | |  | |  |  |  |  |  |  |  |
| CB |  | | 21 (22%) | | 11 | 86% (72%, 100%) | 76% (60%, 97%) | 67% (49%, 90%) | 1.00 |  |  |
| BM/PB |  | | 76 (78%) | | 61 | 75% (66%, 85%) | 49% (39%, 61%) | 34% (25%, 47%) | 2.26 | 1.18, 4.33 | 0.014 |
| **Myeloablative conditioning regimen** | 95 | |  | |  |  |  |  |  |  |  |
| No |  | | 40 (42%) | | 34 | 73% (60%, 88%) | 43% (30%, 61%) | 28% (17%, 45%) | 1.82 | 1.12-2.94 | 0.014 |
| Yes |  | | 55 (58%) | | 37 | 80% (70%, 91%) | 64% (52%, 78%) | 51% (39%, 66%) | 1.00 |  |  |
| **Number of Allo-HCT** | 97 | |  | |  |  |  |  |  |  |  |
| 1 |  | | 92 (95%) | | 68 | 78% (70%, 87%) | 55% (46%, 67%) | 42% (33%, 54%) |  |  |  |
| 2 |  | | 5 (5.2%) | | 4 | 60% (29%, 100%) | 40% (14%, 100%) | 20% (3.5%, 100%) |  |  |  |

**Legend.**

M, male; F, female; Allo-HCT, allogeneic hematopoietic cell transplantation; CB, cord blood; BM, bone marrow; PB, peripheral blood; Haplo, haploidentical
